# Supplementary material
Source: PubMed Central journal article supplement (PMC6989024)
Supplement: NIHMS1051526-supplement-Supplemental_Material_1A.pdf [file NIHMS1051526-supplement-Supplemental_Material_1A.pdf]

Supplementary Table 1a. Correlations Among Predictor, Moderator, and Outcome Variables in Wave 3.

|                                           | 1      | 2      | 3      | 4      | 5      | 6      | 7      | 8      | 9      | 10     | 11     | 12     | 13    | 14     | 15     | 16     | 17     | 18     | 19    | 20 |
|-------------------------------------------|--------|--------|--------|--------|--------|--------|--------|--------|--------|--------|--------|--------|-------|--------|--------|--------|--------|--------|-------|----|
| 1.Wife's depression                       | 1      |        |        |        |        |        |        |        |        |        |        |        |       |        |        |        |        |        |       |    |
| 2.Husband's depression                    | 0.168  | 1      |        |        |        |        |        |        |        |        |        |        |       |        |        |        |        |        |       |    |
| 3.Wife's loneliness                       | 0.395  | 0.150  | 1      |        |        |        |        |        |        |        |        |        |       |        |        |        |        |        |       |    |
| 4.Husband's loneliness                    | 0.141  | 0.303  | 0.261  | 1      |        |        |        |        |        |        |        |        |       |        |        |        |        |        |       |    |
| 5.Wife's anxiety                          | 0.320  | 0.087  | 0.222  | 0.077  | 1      |        |        |        |        |        |        |        |       |        |        |        |        |        |       |    |
| 6.Husband's anxiety                       | 0.150  | 0.296  | 0.136  | 0.161  | 0.251  | 1      |        |        |        |        |        |        |       |        |        |        |        |        |       |    |
| 7.Wife's stress                           | 0.173  | 0.020  | 0.099  | -0.020 | 0.407  | 0.115  | 1      |        |        |        |        |        |       |        |        |        |        |        |       |    |
| 8.Husband's stress                        | 0.042  | 0.180  | 0.076  | 0.119  | 0.077  | 0.362  | 0.079  | 1      |        |        |        |        |       |        |        |        |        |        |       |    |
| 9.Wife's religious service attendance     | -0.046 | -0.113 | -0.005 | -0.037 | -0.014 | -0.018 | -0.027 | -0.032 | 1      |        |        |        |       |        |        |        |        |        |       |    |
| 10.Husband's religious service attendance | 0.024  | -0.156 | 0.029  | -0.073 | 0.015  | -0.055 | -0.018 | -0.029 | 0.769  | 1      |        |        |       |        |        |        |        |        |       |    |
| 11.Wife's social engagement               | -0.178 | -0.139 | -0.130 | -0.104 | -0.086 | -0.097 | -0.054 | 0.008  | 0.481  | 0.400  | 1      |        |       |        |        |        |        |        |       |    |
| 12.Husband's social engagement            | -0.074 | -0.203 | -0.075 | -0.112 | -0.042 | -0.110 | -0.067 | -0.020 | 0.317  | 0.481  | 0.482  | 1      |       |        |        |        |        |        |       |    |
| 13.Wife's family support                  | -0.138 | -0.001 | -0.288 | -0.179 | -0.089 | 0.009  | -0.036 | -0.009 | -0.040 | -0.038 | 0.059  | 0.024  | 1     |        |        |        |        |        |       |    |
| 14.Husband's family support               | -0.018 | -0.029 | -0.131 | -0.228 | -0.074 | -0.022 | -0.059 | -0.023 | 0.076  | 0.130  | 0.092  | 0.136  | 0.229 | 1      |        |        |        |        |       |    |
| 15.Wife's friend support                  | -0.116 | -0.016 | -0.094 | -0.067 | -0.096 | -0.035 | -0.026 | 0.073  | -0.016 | 0.017  | 0.221  | 0.194  | 0.275 | 0.135  | 1      |        |        |        |       |    |
| 16.Husband's friend support               | -0.057 | -0.059 | 0.000  | -0.101 | -0.087 | -0.070 | -0.088 | 0.011  | 0.064  | 0.156  | 0.175  | 0.283  | 0.087 | 0.356  | 0.228  | 1      |        |        |       |    |
| 17.Wife becomes caregiver for husband     | 0.069  | 0.110  | 0.067  | 0.006  | 0.093  | 0.043  | 0.083  | 0.028  | -0.007 | -0.052 | -0.037 | -0.203 | 0.042 | 0.025  | 0.060  | -0.040 | 1      |        |       |    |
| 18.Husband becomes caregiver for wife     | 0.102  | 0.091  | 0.039  | 0.010  | 0.045  | 0.066  | 0.050  | 0.074  | -0.006 | 0.025  | 0.007  | 0.049  | 0.015 | 0.065  | -0.058 | -0.041 | -0.057 | 1      |       |    |
| 19.Wife's Wave 3 MoCA scores              | -0.194 | -0.060 | -0.164 | -0.125 | -0.055 | -0.098 | 0.073  | -0.003 | -0.044 | -0.043 | 0.252  | 0.169  | 0.086 | 0.017  | 0.246  | 0.079  | -0.025 | -0.134 | 1     |    |
| 20.Husband's Wave 3 MoCA scores           | -0.135 | -0.118 | -0.111 | -0.112 | 0.030  | -0.001 | 0.035  | 0.014  | -0.112 | -0.066 | 0.153  | 0.219  | 0.041 | -0.082 | 0.189  | 0.065  | -0.174 | -0.076 | 0.390 | 1  |

Note: Shaded cells indicate that the respective correlation coefficients are significant at  $p < 0.05$ .
