# Supplementary material
Source: PubMed Central journal article supplement (PMC6989024)
Supplement: NIHMS1051526-supplement-Supplemental_Material_2-3.pdf [file NIHMS1051526-supplement-Supplemental_Material_2-3.pdf]

**Supplementary Table 2.** SEM Regressions of Mental Health, Social Activity, and Social Support on MoCA, Caregiving, and MoCA-by-Caregiving Interactions Showing Standardized Coefficients (SEs). *When inconsistent, the household income reported by the wife is used.*

| Outcome Variable                                          | Depression        | Loneliness         | Anxiety            | Stress            | Religious Service Attendance | Social Engagement | Family Support     | Friend Support     |
|-----------------------------------------------------------|-------------------|--------------------|--------------------|-------------------|------------------------------|-------------------|--------------------|--------------------|
| <b><i>The effect of ... on the Wife's outcomes</i></b>    |                   |                    |                    |                   |                              |                   |                    |                    |
| Wife caring for Husband                                   | 0.024<br>(0.187)  | 0.251<br>(0.157)   | 0.351<br>(0.279)   | 0.477*<br>(0.2)   | -0.011<br>(0.127)            | 0.002<br>(0.121)  | 0.089<br>(0.178)   | 0.106<br>(0.158)   |
| Husband's MoCA                                            | -0.024<br>(0.015) | 0.006<br>(0.017)   | 0.043*<br>(0.018)  | 0.009<br>(0.019)  | -0.017<br>(0.01)             | 0.004<br>(0.012)  | -0.034*<br>(0.015) | 0.016<br>(0.015)   |
| Husband's MoCA ×<br>Wife caring for Husband               | 0.037<br>(0.034)  | -0.042<br>(0.037)  | -0.048<br>(0.052)  | -0.045<br>(0.053) | 0.016<br>(0.022)             | -0.024<br>(0.021) | 0.041<br>(0.036)   | -0.093*<br>(0.032) |
| <b><i>The effect of ... on the Husband's outcomes</i></b> |                   |                    |                    |                   |                              |                   |                    |                    |
| Husband caring for Wife                                   | -0.285<br>(0.191) | -0.261<br>(0.198)  | 0.513*<br>(0.242)  | 0.495*<br>(0.235) | -0.022<br>(0.123)            | -0.175<br>(0.152) | 0.125<br>(0.194)   | -0.328<br>(0.193)  |
| Wife's MoCA                                               | -0.004<br>(0.014) | -0.035*<br>(0.017) | -0.017<br>(0.017)  | 0.019<br>(0.017)  | 0.003<br>(0.01)              | 0.002<br>(0.013)  | 0.012<br>(0.016)   | 0.005<br>(0.015)   |
| Wife's MoCA ×<br>Husband caring for Wife                  | 0.02<br>(0.04)    | 0.077<br>(0.059)   | -0.189**<br>(0.06) | -0.046<br>(0.052) | -0.01<br>(0.038)             | -0.043<br>(0.042) | 0.094<br>(0.061)   | 0.031<br>(0.038)   |
| N                                                         | 588               | 588                | 588                | 588               | 588                          | 588               | 588                | 588                |

**Note.** MoCA-SA: Montreal Cognitive Assessment – Survey Adapted. Covariates included in all models. The outcome variables have been standardized so that the coefficient can be interpreted in standard deviation units.

\*  $p < 0.05$ , \*\*  $p < 0.01$ , \*\*\*  $p < 0.001$  (two-tailed tests)

**Supplementary Table 3.** SEM Regressions of Mental Health, Social Activity, and Social Support on MoCA, Caregiving, and MoCA-by-Caregiving Interactions Showing Standardized Coefficients (SEs). *When inconsistent, the household income reported by the individual with the higher cognitive ability is used.*

| Outcome Variable                                   | Depression        | Loneliness         | Anxiety             | Stress            | Religious Service Attendance | Social Engagement | Family Support     | Friend Support     |
|----------------------------------------------------|-------------------|--------------------|---------------------|-------------------|------------------------------|-------------------|--------------------|--------------------|
| <i>The effect of ... on the Wife's outcomes</i>    |                   |                    |                     |                   |                              |                   |                    |                    |
| Wife caring for Husbands                           | 0.032<br>(0.187)  | 0.239<br>(0.158)   | 0.316<br>(0.277)    | 0.499*<br>(0.201) | -0.01<br>(0.132)             | 0.036<br>(0.129)  | 0.054<br>(0.173)   | 0.093<br>(0.156)   |
| Husband's MoCA                                     | -0.024<br>(0.015) | 0.005<br>(0.017)   | 0.041*<br>(0.019)   | 0.006<br>(0.018)  | -0.019<br>(0.01)             | 0.008<br>(0.012)  | -0.033*<br>(0.016) | 0.017<br>(0.015)   |
| Husband's MoCA ×<br>Wife caring for Husband        | 0.038<br>(0.033)  | -0.043<br>(0.037)  | -0.051<br>(0.05)    | -0.029<br>(0.052) | 0.015<br>(0.022)             | -0.023<br>(0.021) | 0.042<br>(0.035)   | -0.090*<br>(0.031) |
| <i>The effect of ... on the Husband's outcomes</i> |                   |                    |                     |                   |                              |                   |                    |                    |
| Husband caring for<br>Husbands                     | -0.323<br>(0.187) | -0.258<br>(0.200)  | 0.529*<br>(0.241)   | 0.482*<br>(0.239) | -0.017<br>(0.124)            | -0.158<br>(0.152) | 0.121<br>(0.192)   | -0.316<br>(0.188)  |
| Wife's MoCA                                        | -0.004<br>(0.014) | -0.037*<br>(0.018) | -0.016<br>(0.017)   | 0.018<br>(0.017)  | 0.006<br>(0.010)             | 0.004<br>(0.013)  | 0.012<br>(0.016)   | 0.008<br>(0.015)   |
| Wife's MoCA ×<br>Husband caring for Wife           | 0.010<br>(0.039)  | 0.075<br>(0.057)   | -0.193**<br>(0.058) | -0.045<br>(0.051) | -0.007<br>(0.038)            | -0.048<br>(0.041) | 0.096<br>(0.060)   | 0.039<br>(0.037)   |
| N                                                  | 588               | 588                | 588                 | 588               | 588                          | 588               | 588                | 588                |

**Note.** MoCA-SA: Montreal Cognitive Assessment – Survey Adapted. Covariates included in all models. The outcome variables have been standardized so that the coefficient can be interpreted in standard deviation units.

\*  $p < 0.05$ , \*\*  $p < 0.01$ , \*\*\*  $p < 0.001$  (two-tailed tests)
