# Supplementary material
Source: PubMed Central journal article supplement (PMC6989024)
Supplement: NIHMS1051526-supplement-Supplemental_Material_4.pdf [file NIHMS1051526-supplement-Supplemental_Material_4.pdf]

Supplementary Table 4. SEM Regressions of Mental Health, Social Activity, and Social Support on MoCA, Caregiving, and MoCA-by-Caregiving Interactions Showing Standardized Coefficients (SEs).

| Outcome Variable                                    | Depression          | Loneliness          | Anxiety             | Stress             |
|-----------------------------------------------------|---------------------|---------------------|---------------------|--------------------|
| <i>The effect of ... on the Wife's outcomes</i>     |                     |                     |                     |                    |
| Wife's outcome in Wave 2                            | 0.470***<br>(0.053) | 0.350***<br>(0.054) | 0.256***<br>(0.056) | 0.136*<br>(0.053)  |
| Husband's outcome in Wave 2                         | -0.006<br>(0.04)    | 0.032<br>(0.048)    | 0.054<br>(0.048)    | 0.095<br>(0.064)   |
| Wife becomes caregiver for husband                  | 0.031<br>(0.183)    | 0.238<br>(0.162)    | 0.296<br>(0.282)    | 0.557**<br>(0.206) |
| Husband becomes caregiver for wife                  | 0.009<br>(0.176)    | 0.258<br>(0.207)    | 0.368<br>(0.234)    | 0.245<br>(0.208)   |
| Wife's MoCA                                         | -0.033*<br>(0.015)  | -0.054**<br>(0.018) | -0.045*<br>(0.019)  | 0.023<br>(0.019)   |
| Husband's MoCA                                      | -0.021<br>(0.015)   | 0.006<br>(0.017)    | 0.039*<br>(0.018)   | 0.009<br>(0.019)   |
| Husband's MoCA × wife becomes caregiver for husband | 0.031<br>(0.033)    | -0.046<br>(0.037)   | -0.054<br>(0.051)   | -0.033<br>(0.052)  |
| Wife's change of MoCA                               | 0.029†<br>(0.017)   | 0.029<br>(0.018)    | 0.032<br>(0.021)    | 0.014<br>(0.024)   |

|                                                               |                     |                   |                    |                   |
|---------------------------------------------------------------|---------------------|-------------------|--------------------|-------------------|
| Husband's change of MoCA                                      | -0.007<br>(0.015)   | -0.004<br>(0.018) | -0.036†<br>(0.019) | -0.011<br>(0.021) |
| Husband's change of MoCA × wife becomes caregiver for husband | 0.000<br>(0.051)    | 0.082<br>(0.055)  | -0.019<br>(0.107)  | 0.011<br>(0.066)  |
| Wife' number of difficulties with ADLs                        | 0.092†<br>(0.049)   | 0.078<br>(0.072)  | 0.047<br>(0.059)   | -0.038<br>(0.059) |
| Husbands' number of difficulties with ADLs                    | 0.049<br>(0.056)    | -0.076<br>(0.060) | 0.055<br>(0.077)   | -0.073<br>(0.069) |
| Wife' change in number of difficulties with ADLs              | 0.173***<br>(0.052) | 0.028<br>(0.066)  | 0.091<br>(0.056)   | 0.002<br>(0.065)  |
| Husbands' change in number of difficulties with ADLs          | 0.008<br>(0.039)    | -0.004<br>(0.043) | -0.006<br>(0.056)  | -0.059<br>(0.059) |
| Household income (ref = less than \$25,000)                   |                     |                   |                    |                   |
| \$25,000 <= \$50,000                                          | -0.015<br>(0.14)    | 0.093<br>(0.17)   | 0.473*<br>(0.192)  | 0.438†<br>(0.224) |
| >\$50,000 <=\$100,000                                         | -0.002<br>(0.147)   | -0.047<br>(0.171) | 0.280<br>(0.187)   | 0.175<br>(0.223)  |
| > \$100,000                                                   | -0.028<br>(0.225)   | -0.017<br>(0.234) | 0.450<br>(0.324)   | 0.052<br>(0.319)  |
| Missing                                                       | -0.107<br>(0.164)   | 0.109<br>(0.196)  | 0.275<br>(0.214)   | 0.199<br>(0.235)  |

|                                         |                   |                    |                     |                    |
|-----------------------------------------|-------------------|--------------------|---------------------|--------------------|
| Race (ref = White and others)           |                   |                    |                     |                    |
| Black                                   | -0.085<br>(0.162) | 0.346†<br>(0.207)  | -0.138<br>(0.181)   | -0.114<br>(0.194)  |
| Hispanic                                | 0.035<br>(0.211)  | -0.247<br>(0.170)  | -0.619**<br>(0.207) | -0.112<br>(0.286)  |
| Education (ref = Less than High School) |                   |                    |                     |                    |
| High school or equivalent               | 0.399*<br>(0.164) | 0.243<br>(0.193)   | 0.088<br>(0.215)    | -0.377†<br>(0.214) |
| Some college                            | 0.331*<br>(0.162) | 0.061<br>(0.190)   | -0.176<br>(0.225)   | -0.187<br>(0.205)  |
| Bachelor's degree or more               | 0.368*<br>(0.183) | 0.219<br>(0.212)   | -0.040<br>(0.225)   | -0.081<br>(0.230)  |
| Age in years (ref = Less than 64)       |                   |                    |                     |                    |
| 65-74                                   | 0.018<br>(0.090)  | -0.035<br>(0.101)  | -0.050<br>(0.109)   | 0.119<br>(0.107)   |
| 75-84                                   | 0.152<br>(0.118)  | 0.025<br>(0.158)   | -0.398*<br>(0.163)  | -0.052<br>(0.153)  |
| >= 85                                   | 0.427<br>(0.593)  | -0.856*<br>(0.354) | -0.132<br>(0.411)   | 0.203<br>(0.37)    |
| Wife's comorbidity Index (ref = 0)      |                   |                    |                     |                    |
| 1                                       | -0.094            | 0.029              | 0.002               | 0.127              |

|                                       |                   |                   |                   |                   |
|---------------------------------------|-------------------|-------------------|-------------------|-------------------|
|                                       | (0.156)           | (0.175)           | (0.211)           | (0.192)           |
| 2                                     | -0.052<br>(0.155) | -0.034<br>(0.156) | -0.216<br>(0.201) | 0.108<br>(0.198)  |
| 3                                     | -0.023<br>(0.165) | 0.041<br>(0.177)  | 0.085<br>(0.214)  | 0.260<br>(0.191)  |
| 4 and more                            | 0.056<br>(0.157)  | 0.056<br>(0.172)  | 0.100<br>(0.238)  | 0.146<br>(0.220)  |
| Husband's comorbidity index (ref = 0) |                   |                   |                   |                   |
| 1                                     | 0.063<br>(0.158)  | -0.200<br>(0.177) | 0.085<br>(0.198)  | -0.158<br>(0.178) |
| 2                                     | 0.066<br>(0.152)  | -0.133<br>(0.182) | 0.167<br>(0.193)  | -0.129<br>(0.180) |
| 3                                     | 0.069<br>(0.161)  | -0.199<br>(0.187) | 0.071<br>(0.206)  | -0.050<br>(0.209) |
| 4 and more                            | -0.042<br>(0.157) | -0.229<br>(0.19)  | -0.119<br>(0.195) | -0.017<br>(0.18)  |

Supplementary Table 4, cont'd.

| Outcome Variable                                   | Depression          | Loneliness          | Anxiety              | Stress            |
|----------------------------------------------------|---------------------|---------------------|----------------------|-------------------|
| <i>The effect of ... on the Husband's outcomes</i> |                     |                     |                      |                   |
| Husband's outcome in Wave 2                        | 0.454***<br>(0.049) | 0.422***<br>(0.064) | 0.341***<br>(0.047)  | 0.136*<br>(0.065) |
| Wife's outcome in Wave 2                           | 0.018<br>(0.044)    | 0.095<br>(0.063)    | 0.162**<br>(0.049)   | -0.004<br>(0.058) |
| Husband becomes caregiver for wife                 | -0.354†<br>(0.182)  | -0.215<br>(0.205)   | 0.518*<br>(0.247)    | 0.487*<br>(0.240) |
| Wife becomes caregiver for husband                 | 0.086<br>(0.235)    | -0.104<br>(0.192)   | 0.310<br>(0.205)     | 0.508*<br>(0.207) |
| Husband's MoCA                                     | -0.020<br>(0.017)   | -0.011<br>(0.016)   | 0.002<br>(0.017)     | 0.016<br>(0.018)  |
| Wife's MoCA                                        | -0.006<br>(0.015)   | -0.041*<br>(0.018)  | -0.017<br>(0.017)    | 0.018<br>(0.017)  |
| Wife's MoCA × husband becomes caregiver for wife   | 0.006<br>(0.038)    | 0.087<br>(0.059)    | -0.198***<br>(0.059) | -0.052<br>(0.050) |
| Husband's change of MoCA                           | 0.010<br>(0.014)    | 0.010<br>(0.018)    | 0.013<br>(0.017)     | 0.000<br>(0.019)  |
| Wife's change of MoCA                              | 0.009<br>(0.016)    | 0.013<br>(0.019)    | -0.019<br>(0.02)     | -0.030<br>(0.024) |

|                                                            |                      |                    |                    |                    |
|------------------------------------------------------------|----------------------|--------------------|--------------------|--------------------|
| Wife's change of MoCA × husband becomes caregiver for wife | -0.157***<br>(0.043) | -0.114†<br>(0.063) | 0.192**<br>(0.072) | 0.048<br>(0.066)   |
| Husbands' number of difficulties with ADLs                 | 0.119<br>(0.074)     | 0.002<br>(0.071)   | 0.030<br>(0.062)   | -0.042<br>(0.065)  |
| Wife's number of difficulties with ADLs                    | -0.016<br>(0.043)    | -0.154*<br>(0.063) | -0.028<br>(0.059)  | -0.064<br>(0.061)  |
| Husbands' change in number of difficulties with ADLs       | 0.130*<br>(0.059)    | 0.005<br>(0.058)   | -0.097<br>(0.069)  | 0.023<br>(0.069)   |
| Wife's change in number of difficulties with ADLs          | 0.128*<br>(0.054)    | 0.007<br>(0.052)   | -0.019<br>(0.047)  | -0.110*<br>(0.052) |
| Household income (ref = less than \$25,000)                |                      |                    |                    |                    |
| \$25,000 <= \$50,000                                       | 0.052<br>(0.192)     | 0.009<br>(0.177)   | 0.053<br>(0.196)   | -0.195<br>(0.186)  |
| >\$50,000 <=\$100,000                                      | 0.008<br>(0.179)     | 0.212<br>(0.178)   | 0.109<br>(0.208)   | -0.094<br>(0.189)  |
| > \$100,000                                                | -0.159<br>(0.223)    | -0.131<br>(0.219)  | 0.264<br>(0.274)   | -0.327<br>(0.250)  |
| Missing                                                    | 0.124<br>(0.186)     | 0.331<br>(0.203)   | 0.185<br>(0.237)   | -0.135<br>(0.240)  |
| Race (ref = White and others)                              |                      |                    |                    |                    |
| Black                                                      | -0.193               | 0.183              | 0.033              | 0.480†             |

|                                         |                     |                   |                   |                   |
|-----------------------------------------|---------------------|-------------------|-------------------|-------------------|
|                                         | (0.145)             | (0.213)           | (0.231)           | (0.258)           |
| Hispanic                                | -0.241†<br>(0.139)  | -0.120<br>(0.178) | -0.097<br>(0.189) | 0.110<br>(0.196)  |
| Education (ref = less than high school) |                     |                   |                   |                   |
| High school or equivalent               | -0.057<br>(0.163)   | 0.023<br>(0.201)  | 0.080<br>(0.191)  | -0.132<br>(0.221) |
| Some college                            | -0.093<br>(0.163)   | -0.092<br>(0.196) | -0.038<br>(0.177) | 0.099<br>(0.206)  |
| Bachelor's degree or more               | -0.175<br>(0.167)   | -0.197<br>(0.205) | -0.019<br>(0.196) | 0.012<br>(0.231)  |
| Age in years (ref = Less than 64)       |                     |                   |                   |                   |
| 65-74                                   | -0.062<br>(0.092)   | -0.134<br>(0.133) | -0.030<br>(0.138) | -0.232<br>(0.151) |
| 75-84                                   | 0.049<br>(0.116)    | -0.076<br>(0.147) | -0.119<br>(0.161) | -0.062<br>(0.185) |
| >= 85                                   | -0.570**<br>(0.199) | 0.153<br>(0.384)  | -0.084<br>(0.367) | 0.232<br>(0.328)  |
| Husband's comorbidity index (ref = 0)   |                     |                   |                   |                   |
| 1                                       | 0.037<br>(0.122)    | -0.110<br>(0.205) | -0.199<br>(0.229) | -0.318<br>(0.206) |
| 2                                       | 0.109               | -0.116            | -0.095            | 0.039             |

|                                    |                    |                    |                   |                   |
|------------------------------------|--------------------|--------------------|-------------------|-------------------|
|                                    | (0.123)            | (0.189)            | (0.222)           | (0.199)           |
| 3                                  | 0.044<br>(0.130)   | -0.139<br>(0.189)  | -0.257<br>(0.225) | -0.312<br>(0.226) |
| 4 and more                         | 0.214<br>(0.144)   | 0.153<br>(0.197)   | -0.187<br>(0.211) | 0.001<br>(0.201)  |
| Wife's comorbidity index (ref = 0) |                    |                    |                   |                   |
| 1                                  | -0.204<br>(0.197)  | 0.420**<br>(0.158) | 0.148<br>(0.191)  | 0.034<br>(0.183)  |
| 2                                  | -0.315<br>(0.201)  | 0.301*<br>(0.147)  | -0.130<br>(0.169) | -0.109<br>(0.191) |
| 3                                  | -0.249<br>(0.212)  | 0.117<br>(0.149)   | 0.031<br>(0.173)  | -0.186<br>(0.200) |
| 4 and more                         | -0.376†<br>(0.212) | 0.331*<br>(0.163)  | 0.007<br>(0.173)  | -0.079<br>(0.198) |

---



Supplementary Table 4, cont'd.

| Outcome Variable                                    | Religious<br>Service<br>Attendance | Social<br>Engagement | Family<br>Support   | Friend<br>Support   |
|-----------------------------------------------------|------------------------------------|----------------------|---------------------|---------------------|
| <i>The effect of ... on the Wife's outcomes</i>     |                                    |                      |                     |                     |
| Wife's outcome in Wave 2                            | 0.643***<br>(0.052)                | 0.636***<br>(0.051)  | 0.287***<br>(0.065) | 0.349***<br>(0.051) |
| Husband's outcome in Wave 2                         | 0.097†<br>(0.050)                  | 0.097*<br>(0.043)    | -0.001<br>(0.042)   | 0.046<br>(0.042)    |
| Wife becomes caregiver for husband                  | -0.002<br>(0.131)                  | 0.046<br>(0.134)     | 0.090<br>(0.176)    | 0.081<br>(0.155)    |
| Husband becomes caregiver for wife                  | -0.145<br>(0.107)                  | -0.011<br>(0.152)    | 0.183<br>(0.165)    | 0.121<br>(0.183)    |
| Wife's MoCA                                         | 0.015<br>(0.012)                   | 0.031*<br>(0.013)    | 0.038*<br>(0.017)   | 0.005<br>(0.018)    |
| Husband's MoCA                                      | -0.018†<br>(0.010)                 | 0.009<br>(0.013)     | -0.031†<br>(0.016)  | 0.016<br>(0.015)    |
| Husband's MoCA × wife becomes caregiver for husband | 0.016<br>(0.021)                   | -0.023<br>(0.021)    | 0.040<br>(0.034)    | -0.090**<br>(0.031) |
| Wife's change of MoCA                               | -0.020<br>(0.014)                  | -0.027†<br>(0.015)   | -0.045*<br>(0.018)  | 0.023<br>(0.018)    |
| Husband's change of MoCA                            | 0.005                              | 0.002                | 0.041*<br>(0.018)   | 0.031†<br>(0.018)   |

|                                                               |                    |                      |                    |                    |
|---------------------------------------------------------------|--------------------|----------------------|--------------------|--------------------|
|                                                               | (0.011)            | (0.013)              | (0.017)            | (0.017)            |
| Husband's change of MoCA × wife becomes caregiver for husband | 0.012<br>(0.033)   | -0.007<br>(0.035)    | -0.104†<br>(0.059) | -0.016<br>(0.042)  |
| Wife' number of difficulties with ADLs                        | -0.066†<br>(0.034) | -0.187***<br>(0.039) | -0.115*<br>(0.055) | -0.103<br>(0.063)  |
| Husbands' number of difficulties with ADLs                    | -0.083†<br>(0.049) | -0.055<br>(0.055)    | 0.016<br>(0.059)   | 0.048<br>(0.056)   |
| Wife' change in number of difficulties with ADLs              | -0.090*<br>(0.036) | -0.057<br>(0.043)    | 0.013<br>(0.045)   | 0.030<br>(0.059)   |
| Husbands' change in number of difficulties with ADLs          | -0.010<br>(0.030)  | -0.071*<br>(0.035)   | -0.021<br>(0.050)  | -0.009<br>(0.040)  |
| Household income (ref = less than \$25,000)                   |                    |                      |                    |                    |
| \$25,000 <= \$50,000                                          | -0.017<br>(0.121)  | 0.052<br>(0.129)     | 0.121<br>(0.166)   | -0.039<br>(0.175)  |
| >\$50,000 <=\$100,000                                         | 0.083<br>(0.136)   | 0.039<br>(0.135)     | 0.160<br>(0.180)   | -0.070<br>(0.174)  |
| > \$100,000                                                   | 0.076<br>(0.169)   | -0.296<br>(0.226)    | -0.237<br>(0.262)  | -0.432†<br>(0.233) |
| Missing                                                       | -0.099<br>(0.139)  | -0.053<br>(0.171)    | 0.164<br>(0.206)   | 0.022<br>(0.197)   |
| Race (ref = White and others)                                 |                    |                      |                    |                    |

|                                         |                    |                   |                   |                   |
|-----------------------------------------|--------------------|-------------------|-------------------|-------------------|
| Black                                   | 0.316**<br>(0.107) | 0.265†<br>(0.141) | -0.156<br>(0.162) | 0.019<br>(0.138)  |
| Hispanic                                | 0.104<br>(0.142)   | 0.287*<br>(0.146) | -0.091<br>(0.225) | 0.014<br>(0.169)  |
| Education (ref = Less than High School) |                    |                   |                   |                   |
| High school or equivalent               | 0.058<br>(0.114)   | -0.148<br>(0.128) | 0.023<br>(0.207)  | -0.062<br>(0.17)  |
| Some college                            | 0.135<br>(0.125)   | -0.138<br>(0.143) | -0.015<br>(0.213) | 0.069<br>(0.181)  |
| Bachelor's degree or more               | 0.090<br>(0.136)   | -0.074<br>(0.158) | -0.084<br>(0.227) | 0.325†<br>(0.193) |
| Age in years (ref = Less than 64)       |                    |                   |                   |                   |
| 65-74                                   | 0.028<br>(0.059)   | -0.080<br>(0.071) | -0.077<br>(0.099) | -0.052<br>(0.092) |
| 75-84                                   | 0.041<br>(0.085)   | -0.074<br>(0.115) | -0.002<br>(0.157) | 0.086<br>(0.136)  |
| >= 85                                   | -0.459*<br>(0.205) | 0.182<br>(0.823)  | -0.324<br>(0.447) | -0.137<br>(0.297) |
| Wife's comorbidity Index (ref = 0)      |                    |                   |                   |                   |
| 1                                       | -0.161<br>(0.144)  | 0.219<br>(0.134)  | -0.102<br>(0.139) | -0.265<br>(0.182) |

|                                       |                    |                  |                    |                    |
|---------------------------------------|--------------------|------------------|--------------------|--------------------|
| 2                                     | -0.239†<br>(0.129) | 0.085<br>(0.134) | -0.094<br>(0.137)  | -0.153<br>(0.171)  |
| 3                                     | -0.141<br>(0.135)  | 0.215<br>(0.139) | -0.023<br>(0.141)  | -0.156<br>(0.172)  |
| 4 and more                            | -0.269†<br>(0.137) | 0.083<br>(0.141) | -0.113<br>(0.15)   | -0.167<br>(0.183)  |
| Husband's comorbidity index (ref = 0) |                    |                  |                    |                    |
| 1                                     | -0.062<br>(0.161)  | 0.128<br>(0.127) | -0.202<br>(0.156)  | 0.151<br>(0.18)    |
| 2                                     | -0.068<br>(0.160)  | 0.017<br>(0.119) | -0.168<br>(0.150)  | 0.445**<br>(0.167) |
| 3                                     | 0.049<br>(0.158)   | 0.028<br>(0.127) | -0.169<br>(0.155)  | 0.173<br>(0.189)   |
| 4 and more                            | -0.016<br>(0.150)  | 0.051<br>(0.128) | -0.370*<br>(0.172) | 0.224<br>(0.174)   |

Supplementary Table 4, cont'd.

| Outcome Variable                                   | Religious<br>Service<br>Attendance | Social<br>Engagement | Family<br>Support   | Friend<br>Support   |
|----------------------------------------------------|------------------------------------|----------------------|---------------------|---------------------|
| <i>The effect of ... on the Husband's outcomes</i> |                                    |                      |                     |                     |
| Husband's outcome in Wave 2                        | 0.512***<br>(0.058)                | 0.523***<br>(0.044)  | 0.262***<br>(0.046) | 0.360***<br>(0.043) |
| Wife's outcome in Wave 2                           | 0.273***<br>(0.060)                | 0.145**<br>(0.048)   | 0.008<br>(0.038)    | 0.033<br>(0.043)    |
| Husband becomes caregiver for wife                 | 0.028<br>(0.125)                   | -0.174<br>(0.157)    | 0.170<br>(0.197)    | -0.313<br>(0.195)   |
| Wife becomes caregiver for husband                 | 0.000<br>(0.143)                   | -0.272†<br>(0.148)   | 0.150<br>(0.178)    | -0.512**<br>(0.185) |
| Husband's MoCA                                     | -0.006<br>(0.010)                  | 0.003<br>(0.012)     | -0.043*<br>(0.018)  | -0.036*<br>(0.016)  |
| Wife's MoCA                                        | 0.003<br>(0.010)                   | 0.000<br>(0.013)     | 0.015<br>(0.016)    | 0.007<br>(0.016)    |
| Wife's MoCA × husband becomes caregiver for wife   | -0.009<br>(0.040)                  | -0.044<br>(0.045)    | 0.096<br>(0.062)    | 0.036<br>(0.039)    |
| Husband's change of MoCA                           | -0.004<br>(0.011)                  | -0.005<br>(0.011)    | 0.024<br>(0.018)    | 0.041*<br>(0.016)   |
| Wife's change of MoCA                              | -0.023                             | 0.002                | 0.011               | 0.014               |

|                                                            |                    |                    |                   |                   |
|------------------------------------------------------------|--------------------|--------------------|-------------------|-------------------|
|                                                            | (0.015)            | (0.015)            | (0.017)           | (0.019)           |
| Wife's change of MoCA × husband becomes caregiver for Wife | 0.068<br>(0.047)   | 0.018<br>(0.053)   | -0.084<br>(0.069) | -0.074<br>(0.046) |
| Husbands' number of difficulties with ADLs                 | -0.057<br>(0.042)  | -0.021<br>(0.048)  | 0.023<br>(0.067)  | 0.081<br>(0.058)  |
| Wife's number of difficulties with ADLs                    | -0.019<br>(0.033)  | 0.002<br>(0.041)   | -0.069<br>(0.065) | 0.064<br>(0.048)  |
| Husbands' change in number of difficulties with ADLs       | -0.013<br>(0.026)  | 0.004<br>(0.040)   | 0.033<br>(0.046)  | -0.010<br>(0.043) |
| Wife's change in number of difficulties with ADLs          | -0.060†<br>(0.032) | -0.086*<br>(0.034) | -0.023<br>(0.050) | 0.045<br>(0.042)  |
| Household income (ref = less than \$25,000)                |                    |                    |                   |                   |
| \$25,000 <= \$50,000                                       | 0.114<br>(0.123)   | 0.160<br>(0.125)   | -0.149<br>(0.175) | -0.105<br>(0.194) |
| >\$50,000 <=\$100,000                                      | 0.318*<br>(0.134)  | 0.307*<br>(0.122)  | -0.025<br>(0.175) | 0.083<br>(0.192)  |
| > \$100,000                                                | 0.321*<br>(0.162)  | 0.236<br>(0.189)   | -0.362<br>(0.315) | -0.178<br>(0.278) |
| Missing                                                    | 0.045<br>(0.132)   | 0.239†<br>(0.138)  | -0.201<br>(0.199) | -0.019<br>(0.189) |
| Race (ref = White and others)                              |                    |                    |                   |                   |

|                                         |                   |                    |                     |                   |
|-----------------------------------------|-------------------|--------------------|---------------------|-------------------|
| Black                                   | 0.007<br>(0.095)  | 0.050<br>(0.143)   | -0.184<br>(0.182)   | 0.092<br>(0.149)  |
| Hispanic                                | -0.011<br>(0.108) | -0.079<br>(0.132)  | 0.137<br>(0.158)    | -0.179<br>(0.167) |
| Education (ref = less than high school) |                   |                    |                     |                   |
| High school or equivalent               | 0.157†<br>(0.094) | -0.185<br>(0.114)  | 0.197<br>(0.165)    | 0.053<br>(0.143)  |
| Some college                            | -0.009<br>(0.092) | -0.011<br>(0.116)  | 0.137<br>(0.166)    | 0.189<br>(0.146)  |
| Bachelor's degree or more               | 0.034<br>(0.101)  | -0.095<br>(0.124)  | 0.240<br>(0.18)     | 0.009<br>(0.154)  |
| Age in years (ref = Less than 64)       |                   |                    |                     |                   |
| 65-74                                   | 0.048<br>(0.076)  | 0.010<br>(0.078)   | 0.119<br>(0.111)    | -0.008<br>(0.100) |
| 75-84                                   | -0.067<br>(0.097) | -0.036<br>(0.101)  | -0.003<br>(0.138)   | -0.061<br>(0.119) |
| >= 85                                   | -0.004<br>(0.176) | 0.410†<br>(0.226)  | -0.873**<br>(0.282) | 0.231<br>(0.280)  |
| Husband's comorbidity index (ref = 0)   |                   |                    |                     |                   |
| 1                                       | -0.073<br>(0.169) | 0.321**<br>(0.112) | 0.007<br>(0.139)    | -0.084<br>(0.164) |

|                                    |                    |                   |                     |                    |
|------------------------------------|--------------------|-------------------|---------------------|--------------------|
| 2                                  | -0.048<br>(0.167)  | 0.166<br>(0.111)  | 0.126<br>(0.147)    | 0.021<br>(0.163)   |
| 3                                  | -0.009<br>(0.161)  | 0.054<br>(0.122)  | 0.050<br>(0.154)    | -0.113<br>(0.171)  |
| 4 and more                         | -0.083<br>(0.158)  | -0.014<br>(0.115) | -0.094<br>(0.154)   | -0.151<br>(0.180)  |
| Wife's comorbidity index (ref = 0) |                    |                   |                     |                    |
| 1                                  | -0.220<br>(0.163)  | 0.021<br>(0.151)  | -0.522**<br>(0.181) | -0.336<br>(0.217)  |
| 2                                  | -0.218<br>(0.148)  | -0.001<br>(0.160) | -0.398*<br>(0.183)  | -0.408†<br>(0.212) |
| 3                                  | -0.168<br>(0.157)  | -0.067<br>(0.158) | -0.306<br>(0.194)   | -0.215<br>(0.220)  |
| 4 and more                         | -0.349*<br>(0.155) | -0.090<br>(0.157) | -0.385†<br>(0.199)  | -0.300<br>(0.224)  |
|                                    | N                  | 588               | 588                 | 588                |

Note. MoCA-SA: Montreal Cognitive Assessment – Survey Adapted. Covariates included in all models. The outcome variables have been standardized so that coefficients can be interpreted in standard deviation units.

† p < 0.1, \* p < 0.05, \*\* p < 0.01, \*\*\* p < 0.001 (two-tailed tests).
