# Supplementary material
Source: PubMed Central journal article supplement (PMC6989024)
Supplement: NIHMS1051526-supplement-Supplemental_Material_5.pdf [file NIHMS1051526-supplement-Supplemental_Material_5.pdf]

Supplementary Table 5. Coefficient Differences Between Men and Women (Wife’s Coefficient minus Husband’s coefficient), and standard errors (SEs).

| Outcome Variable                                                                                                                           | Depression        | Loneliness        | Anxiety           | Stress            | Religious Service Attendance | Social Engagement | Family Support     | Friend Support     |
|--------------------------------------------------------------------------------------------------------------------------------------------|-------------------|-------------------|-------------------|-------------------|------------------------------|-------------------|--------------------|--------------------|
| <b><i>Difference</i></b>                                                                                                                   |                   |                   |                   |                   |                              |                   |                    |                    |
| Caring for the Partner<br>( $\zeta_1 - \zeta_2$ )                                                                                          | 0.385<br>(0.269)  | 0.453<br>(0.278)  | -0.222<br>(0.368) | 0.070<br>(0.319)  | -0.030<br>(0.177)            | 0.220<br>(0.204)  | -0.080<br>(0.266)  | 0.393<br>(0.252)   |
| Partner’s MoCA<br>( $\phi_{2 \rightarrow 1} - \phi_{1 \rightarrow 2}$ )                                                                    | -0.015<br>(0.021) | 0.047*<br>(0.022) | 0.056*<br>(0.025) | -0.009<br>(0.025) | -0.021<br>(0.016)            | 0.009<br>(0.019)  | -0.045*<br>(0.023) | 0.009<br>(0.023)   |
| Partner’s MoCA ×<br>Caregiver’s Caring for<br>Partner<br>( $\phi_{2 \rightarrow 1 \rightarrow 1} - \phi_{1 \rightarrow 2 \rightarrow 2}$ ) | 0.025<br>(0.047)  | -0.133<br>(0.068) | 0.144†<br>(0.078) | 0.019<br>(0.075)  | 0.025<br>(0.045)             | 0.020<br>(0.050)  | -0.056<br>(0.069)  | -0.126*<br>(0.051) |

Note. MoCA-SA: Montreal Cognitive Assessment – Survey Adapted. Covariates included in all models. The gender-specific coefficients were standardized; the coefficient for the difference can be interpreted in standard deviation units. The unweighted sample size is 588 couples.

† p = 0.051, \* p < 0.05, \*\* p < 0.01, \*\*\* p < 0.001 (two-tailed tests).
