# Supplementary material
Source: PubMed Central journal article supplement (PMC6989024)
Supplement: NIHMS1051526-supplement-Supplemental_Material_6.pdf [file NIHMS1051526-supplement-Supplemental_Material_6.pdf]

Supplementary Table 6. SEM Regressions of Mental Health, Social Activity, and Social Support on MoCA, Caregiving, and MoCA-by-Caregiving Interactions Showing Standardized Coefficients (SEs). Non-Spousal Caregivers Excluded From the Sample.

| Outcome Variable                                                                                         | Depression        | Loneliness        | Anxiety              | Stress            | Religious Service Attendance | Social Engagement | Family Support    | Friend Support      |
|----------------------------------------------------------------------------------------------------------|-------------------|-------------------|----------------------|-------------------|------------------------------|-------------------|-------------------|---------------------|
| <b><i>Wife (Actor 1)</i></b>                                                                             |                   |                   |                      |                   |                              |                   |                   |                     |
| Wife becomes caregiver for husband ( $\zeta_1$ )                                                         | 0.049<br>(0.194)  | 0.331*<br>(0.164) | 0.372<br>(0.276)     | 0.497*<br>(0.204) | -0.046<br>(0.137)            | -0.019<br>(0.131) | 0.045<br>(0.182)  | 0.072<br>(0.158)    |
| Husband's MoCA-SA ( $\phi_{2 \rightarrow 1}$ )                                                           | -0.002<br>(0.016) | 0.008<br>(0.018)  | 0.052*<br>(0.019)    | 0.020<br>(0.018)  | -0.015<br>(0.011)            | 0.018<br>(0.014)  | -0.033<br>(0.018) | 0.026<br>(0.016)    |
| Husband's MoCA-SA $\times$ Wife becomes caregiver for husband ( $\phi_{2 \rightarrow 1 \rightarrow 1}$ ) | 0.018<br>(0.035)  | -0.042<br>(0.037) | -0.061<br>(0.05)     | -0.061<br>(0.054) | 0.01<br>(0.023)              | -0.034<br>(0.022) | 0.049<br>(0.037)  | -0.098**<br>(0.033) |
| <b><i>Husband (Actor 2)</i></b>                                                                          |                   |                   |                      |                   |                              |                   |                   |                     |
| Husband becomes caregiver for wife ( $\zeta_2$ )                                                         | -0.157<br>(0.191) | -0.341<br>(0.218) | 0.541*<br>(0.258)    | 0.516*<br>(0.243) | -0.039<br>(0.132)            | -0.029<br>(0.154) | 0.002<br>(0.199)  | -0.34<br>(0.186)    |
| Wife's MoCA-SA ( $\phi_{1 \rightarrow 2}$ )                                                              | -0.014<br>(0.014) | -0.044*<br>(0.02) | -0.012<br>(0.016)    | 0.023<br>(0.018)  | 0.005<br>(0.012)             | 0.007<br>(0.014)  | 0.002<br>(0.016)  | 0.008<br>(0.016)    |
| Wife's MoCA-SA $\times$ Husband becomes caregiver for Wife ( $\phi_{1 \rightarrow 2 \rightarrow 2}$ )    | -0.003<br>(0.040) | 0.091<br>(0.065)  | -0.186***<br>(0.056) | -0.01<br>(0.055)  | 0.003<br>(0.041)             | -0.072<br>(0.04)  | 0.137*<br>(0.061) | 0.041<br>(0.038)    |

Note. MoCA-SA: Montreal Cognitive Assessment – Survey Adapted. Covariates included in all models. The outcome variables have been standardized so that the coefficient can be interpreted in standard deviation units. The cases who became caregivers for someone other than a spouse in Wave 3 have been excluded from the sample. The unweighted sample size is 520 couples.

\*  $p < 0.05$ , \*\*  $p < 0.01$ , \*\*\*  $p < 0.001$  (two-tailed tests).
